# Supplementary material for: Mild MPP+ exposure-induced glucose starvation enhances autophagosome synthesis and impairs its degradation
Source: PubMed Central journal article supplement (PMC5405408; doi:10.1038/srep46668), 2017-04-26
Supplement: srep46668-s1.pdf [file srep46668-s1.pdf]

**Supplementary figures**

**Mild MPP<sup>+</sup> exposure-induced glucose starvation enhances autophagosome synthesis and impairs its degradation.**

Shuichiro Sakamoto<sup>1</sup>, Masatsugu Miyara<sup>1,2</sup>, Seigo Sanoh<sup>1</sup>, Shigeru Ohta<sup>1</sup> & Yaichiro Kotake<sup>1,\*</sup>

<sup>1</sup>Graduate School of Biomedical and Health Sciences, Hiroshima University, Hiroshima, 734-8553, Japan

<sup>2</sup>Global Career Design Center, Hiroshima University, Hiroshima, 739-8514, Japan

\* To whom correspondence should be addressed: Tel: +81-82-257-5326; E-mail:

yaichiro@hiroshima-u.ac.jp

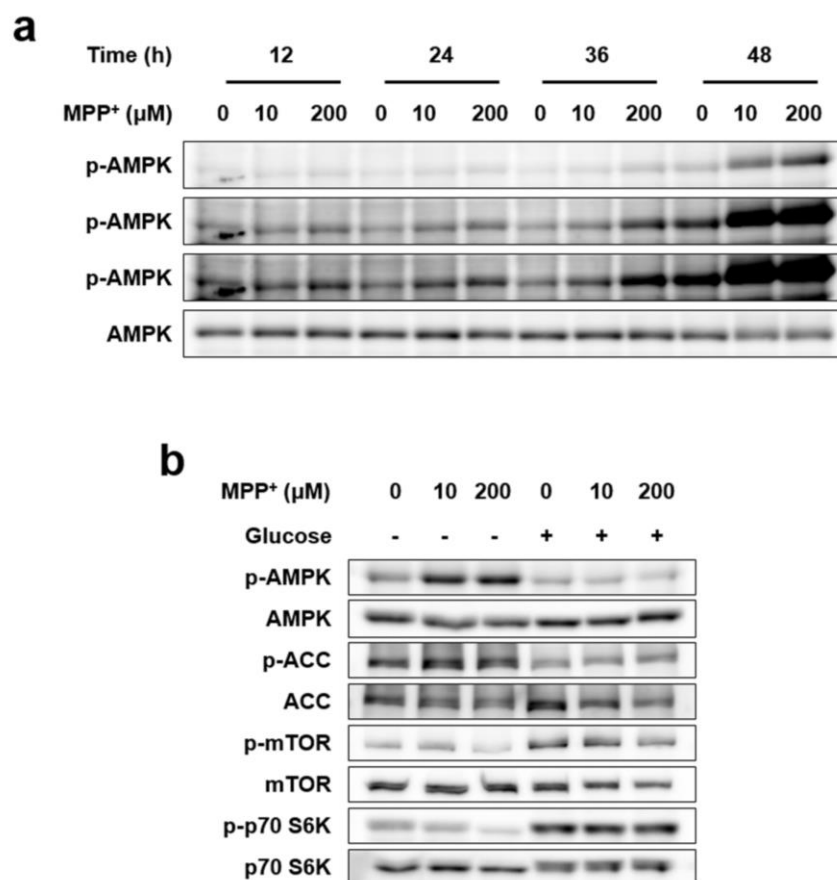

**Supplementary figure 1. Influence of mild MPP<sup>+</sup> exposure on glucose starvation-induced autophagic signal.** (a) SH-SY5Y cells were exposed to 10 and 200 μM 1-methyl-4-phenylpyridinium (MPP<sup>+</sup>) for up to 48 h; p-AMP-activated protein kinase (AMPK) expression at several time points was detected by western blotting. Upper bands were clearly detected in groups exposed to MPP<sup>+</sup> for 48 h. Middle p-AMPK bands were clearly detected in groups exposed to MPP<sup>+</sup> for 36 h. Lower p-AMPK bands were clearly detected in groups exposed to MPP<sup>+</sup> for 12 and 24 h. (b) SH-SY5Y cells were exposed to 10 and 200 μM MPP<sup>+</sup> for 48 h with or without 5.5 mM glucose for the last 12 h. The phosphorylation levels of various proteins were estimated by western blotting.

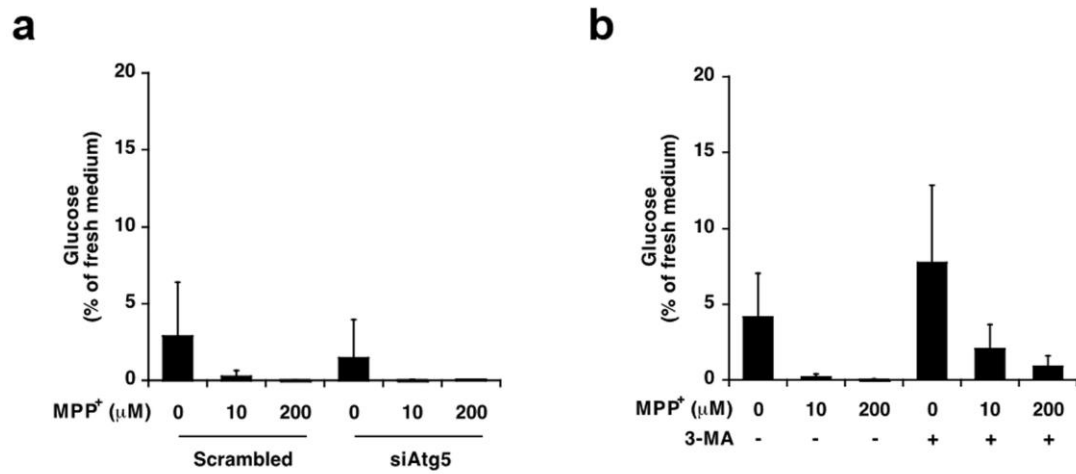

**Supplementary figure 2. Influence of autophagy inhibition on glucose consumption associated with mild MPP<sup>+</sup> exposure.** (a) SH-SY5Y cells were transfected with siRNA specific for autophagy protein 5 (siAtg5) or scrambled control siRNA for 24 h and subsequently exposed to 10 and 200 μM MPP<sup>+</sup> for 48 h; glucose concentrations in the culture media were measured using a commercial assay kit. (b) SH-SY5Y cells were exposed to 10 and 200 μM MPP<sup>+</sup> for 48 h with or without 5 mM 3-MA for the last 24 h; glucose concentrations in the culture media were measured using a commercial assay kit. Data are expressed as the means ± S.D. from at least three independent experiments.
